# Supplementary material
Source: publisher figshare collection journal article supplement (https://karger.figshare.com/articles/dataset/_/4547218)
Supplement: Supplementary file 1 [file 1]

Archive with 10 entries (10 files):
- EAR_201406011_2_9.pdf
- EAR_201406011_2_10.pdf
- EAR_201406011_2_11.pdf
- EAR_201406011_2_12.pdf
- EAR_201406011_2_13.pdf
- EAR_201406011_2_14.pdf
- EAR_201406011_2_15.pdf
- EAR_201406011_2_16.pdf
- EAR_201406011_2_17.pdf
- EAR_201406011_2_18.pdf
