# Supplementary material
Source: publisher figshare collection journal article supplement (https://karger.figshare.com/articles/dataset/_/4547218)
Supplement: Supplementary file 1 [file 1 › EAR_201406011_2_10.pdf]

**Figure S1:**  
**Detection of ALDH2 promoter allele-type by digestion with HpyAV restriction enzyme**

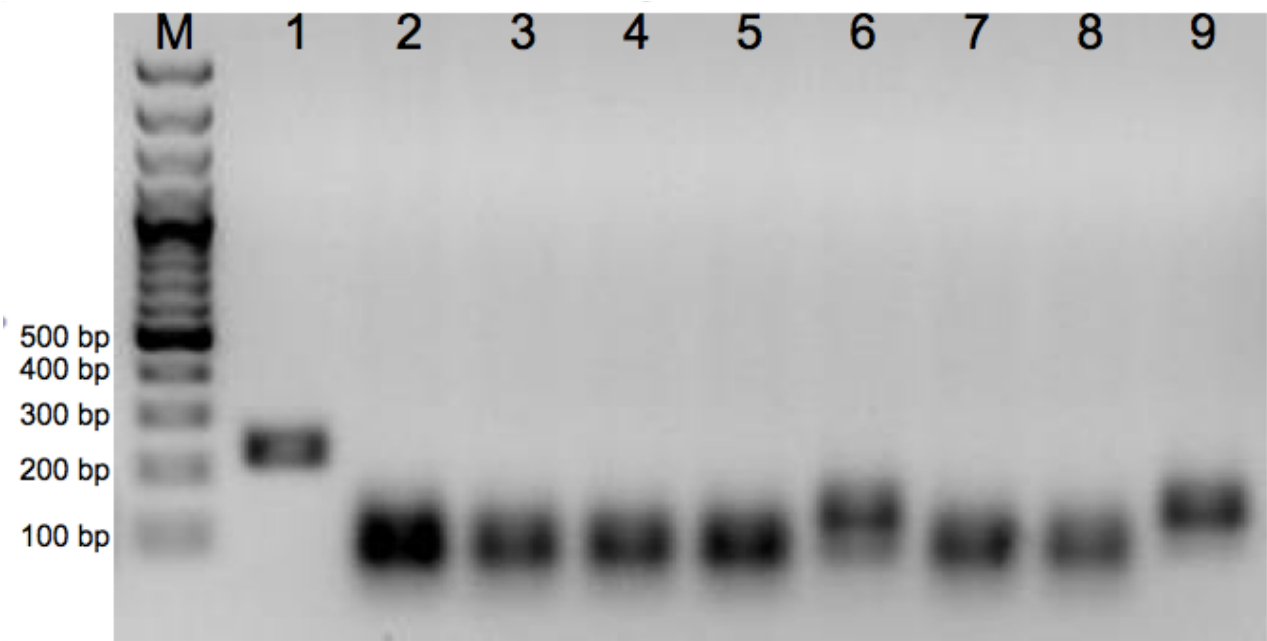

Legend supplementary figure S1:

After restriction enzyme digestion by HpyAV digested PCR products were separated and visualized by 2% agarose gel electrophoresis that was stained with ethidium bromide (M: 100-bp ladder, lane 1: undigested PCR product (224 bp), lane 2 – 5, 7 and 8: ALDH2 A/A promoter genotype (homozygous carriers of A-allele), lane 6: ALDH2 A/G promoter genotype (heterozygous carrier of A- and G-allele), lane 9: ALDH2 G/G promoter genotype (homozygous carrier of G-allele)).
