# Supplementary material
Source: publisher figshare collection journal article supplement (https://karger.figshare.com/articles/dataset/_/4547218)
Supplement: Supplementary file 1 [file 1 › EAR_201406011_2_11.pdf]

**Figure S2:**

**SDS-PAGE for LC-MS/MS validation of human ALDH2 protein in IPs of blood samples and purified ALDH2 protein employed as positive control**

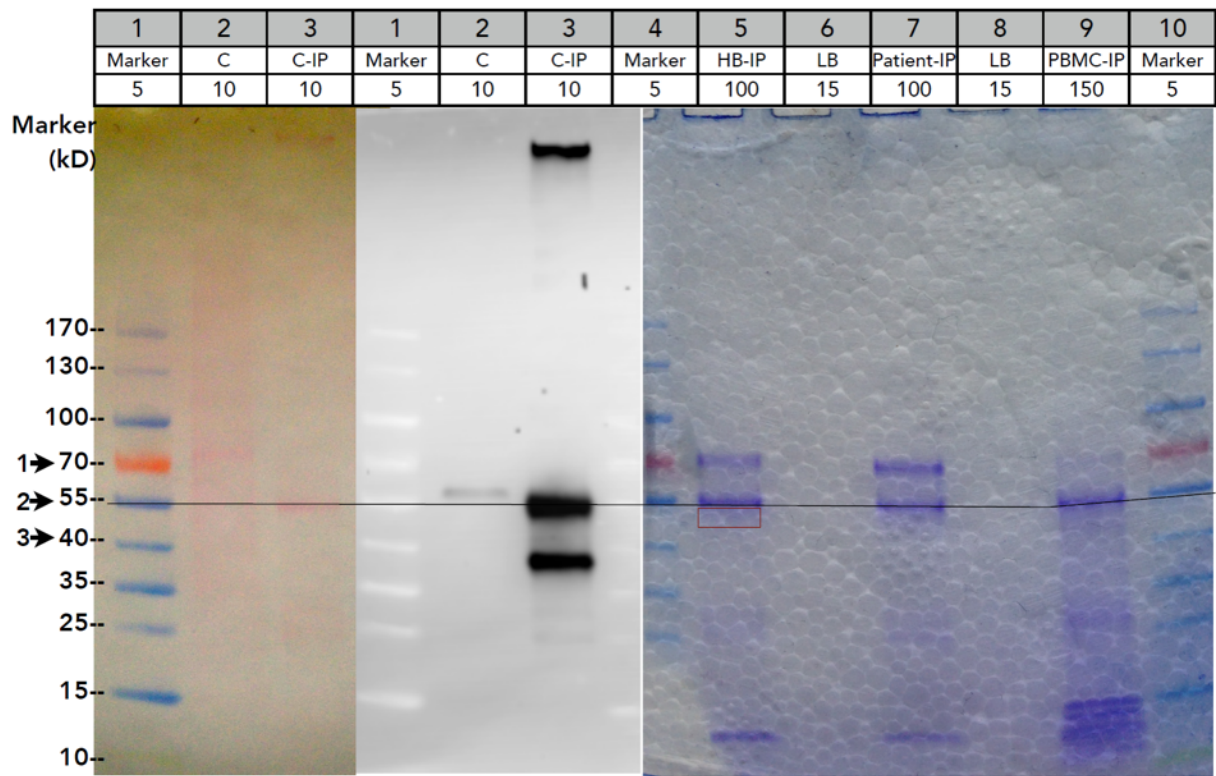

**Lysates:**

| Label      | Description                                                | Origin | Date       |
|------------|------------------------------------------------------------|--------|------------|
| C          | ALDH2 positive control protein                             | human  | 11.02.2013 |
| C-IP       | IP of control lysate                                       | human  | 11.02.2013 |
| HB-IP      | IP of control whole blood lysate                           | human  | 11.02.2013 |
| Patient-IP | IP of patient material                                     | human  | 11.02.2013 |
| PBMC-IP    | IP of PBMC fraction from human control blood (unspecified) | human  | 11.02.2013 |

Legend supplementary figure S2:

SDS-PAGE of immunoprecipitated blood protein lysates (lane 5 and 7) stained with Coomassie Brilliant Blue and detection of immunoprecipitated and untreated purified ALDH2 protein (lanes 2 and 3) by western blot analysis using a monoclonal mouse anti human ALDH2 antibody (C: purified human ALDH2 protein, C-IP: IP of control lysate, HB-IP and Patient-IP: IPs of blood protein lysates generated from frozen whole blood samples of healthy control and a patient, PBMC-IP: IP of protein lysates generated from a unspecified peripheral blood monocytes fraction, LB: loading buffer).
