# Supplementary material
Source: publisher figshare collection journal article supplement (https://karger.figshare.com/articles/dataset/_/4547218)
Supplement: Supplementary file 1 [file 1 › EAR_201406011_2_12.pdf]

**Figure S3:**

**Relative ALDH2 protein quantification in blood lysates from patients with two A-alleles of rs886205 (A/A) and age/genotype-matched, healthy controls**

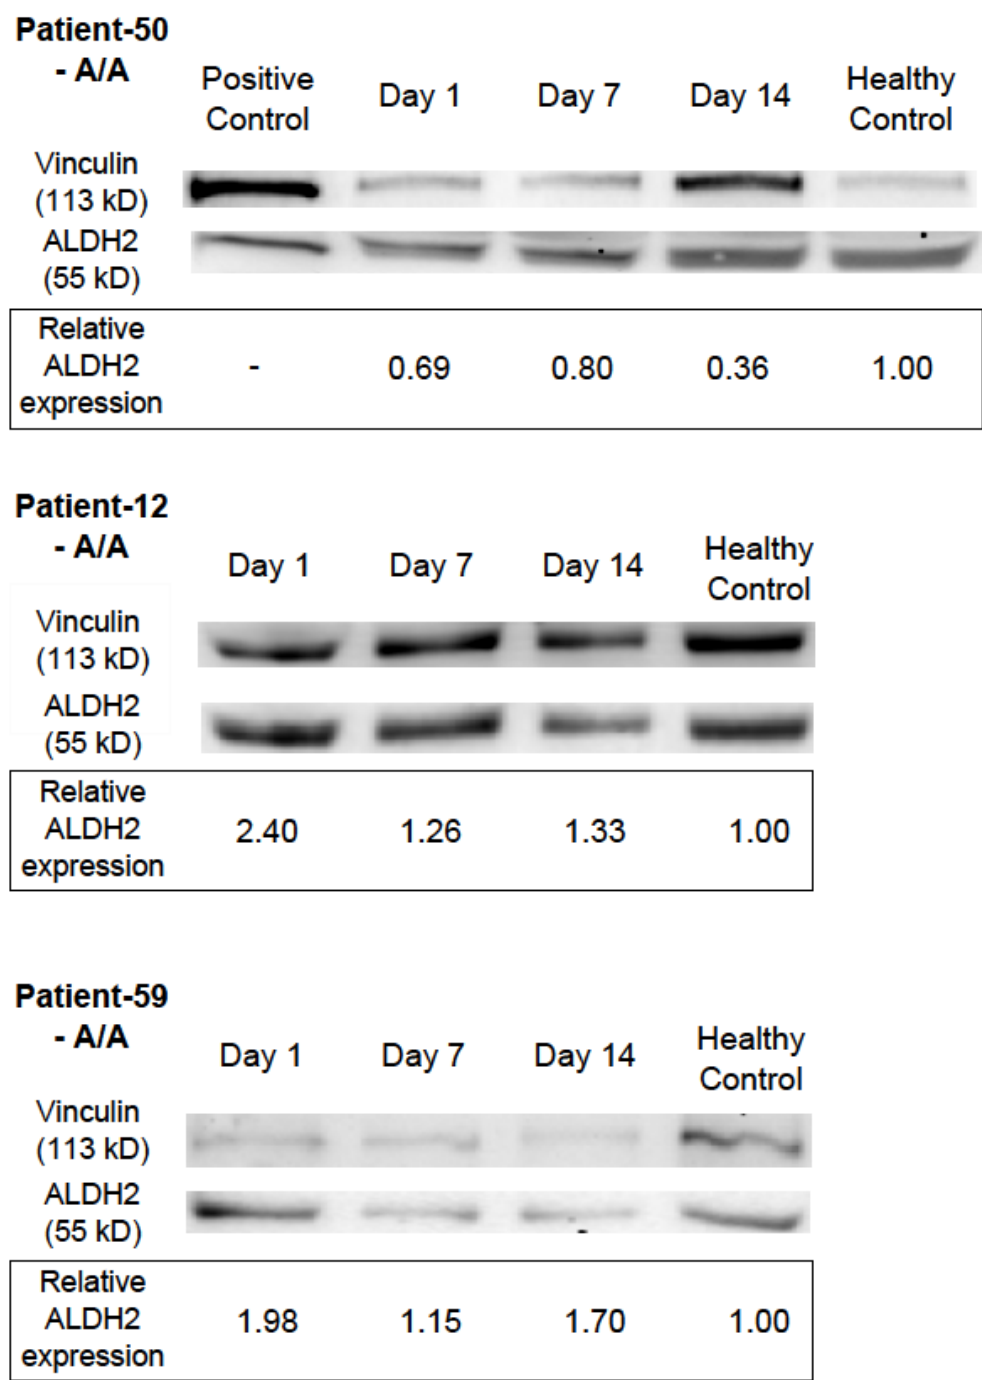

Legend supplementary figures S3:

Detection of ALDH2 protein from blood protein lysates generated from frozen whole blood samples blood was performed as described above.

Quantification of ALDH2 and vinculin band intensities were assessed via densitometry using a Versa Doc™ Imaging System in combination with a Quantity One® 1-D Analysis Software (BioRad, USA).

We normalized ALDH2 band intensity against intensity of loading control protein vinculin. The ALDH2/vinculin ratio was then divided by the ALDH2/vinculin ratio of the respective matched healthy control to calculate the relative ALDH2 expression.
