# Supplementary material
Source: publisher figshare collection journal article supplement (https://karger.figshare.com/articles/dataset/_/4547218)
Supplement: Supplementary file 1 [file 1 › EAR_201406011_2_17.pdf]

**Table S1:**

**Sequences of bisulfite-primers used for ALDH2 target amplification (Metabion, Martinsried)**

|                       | <b>Sequence 5'-3'</b>  | <b>Temperature</b> |
|-----------------------|------------------------|--------------------|
| <i>ALDH2</i> -Bis-F2: | GAGGTATGGTTGTGTGATTG   | 56°C               |
| <i>ALDH2</i> -Bis-RC1 | ACTCACTACAAACTCTACCTCC | 60°C               |
| <i>ALDH2</i> -Bis-F1  | TTTGGTGTTGAAATTAGAGTT  | 52°C               |

Legend supplementary table S1:

In the first PCR of ALDH2 gene amplification, ALDH2-Bis-F2 and ALDH2-Bis-RC1 were used.

ALDH2-Bis-F1 and ALDH2-Bis-RC1 were used as primers in the second PCR.
