# Supplementary material
Source: publisher figshare collection journal article supplement (https://karger.figshare.com/articles/dataset/_/4547218)
Supplement: Supplementary file 1 [file 1 › EAR_201406011_2_18.pdf]

**Table S2: Sequences of primers used for rs886205 target amplification**

|                           | Sequence 5'-3'       | Temperature |
|---------------------------|----------------------|-------------|
| <i>ALDH2</i> -rs886205-F  | CAGGTCTCACTTGTCATTTC | 59°C        |
| <i>ALDH2</i> -rs886205-RC | CTCGCCTTGGTTGAGCCCC  | 64°C        |

Legend supplementary table S2:

For amplification of the rs886205 promoter fragment, ALDH2-rs886205-F and ALDH2-rs886205-RC were used as primers.

The primer ALDH2-rs886205-RC was used for reverse sequencing of the respective fragment.
